# Supplementary material for: Dexmedetomidine reduces propofol-induced hippocampal neuron injury by modulating the miR-377-5p/Arc pathway
Source: PubMed Central journal article supplement (PMC8957152; doi:10.1186/s40360-022-00555-9), 2022-03-25
Supplement: 40360_2022_555_MOESM1_ESM.pdf [file 40360_2022_555_MOESM1_ESM.pdf]

**Figure S1. The binding site with the highest score between miR-377-5p and Arc 3'UTR predicted by the website.**

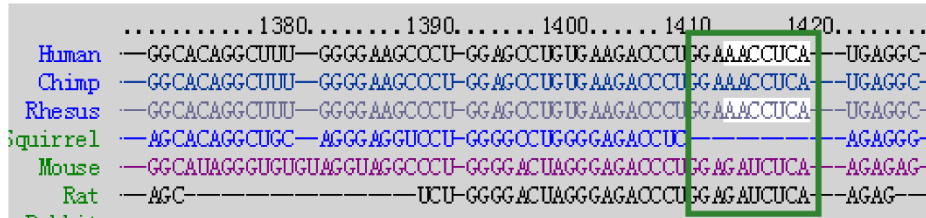

Arc 3'UTR 5'-GCTGCCGCC**AGGGCAACCGGCC**-3'  
 Mmu-mir-377-5p 3'-CTTAAGTGGT**TCCCGTTGGAGA**-5'

|                                  | Predicted consequential pairing of target region (top) and miRNA (bottom) | Site type | Context++ score | Context++ score percentile | Weighted context++ score | Conserved branch length | PCT |
|----------------------------------|---------------------------------------------------------------------------|-----------|-----------------|----------------------------|--------------------------|-------------------------|-----|
| Position 436-442 of ARC 3' UTR   | 5' ...CAGAGAUCUGAGGGAACCCUCA...<br>3' CUUAAAGUGGUUCCCGUUGGAGA             | 7mer-A1   | -0.03           | 34                         | -0.03                    | 0                       | N/A |
| Position 436-442 of ARC 3' UTR   | 5' ...CAGAGAUCUGAGGGAACCCUCA...<br>3' AGUGUGUGUCAUGUGUGGAGU               | 7mer-A1   | -0.03           | 20                         | -0.01                    | 0                       | N/A |
| Position 1273-1279 of ARC 3' UTR | 5' ...UGAUGUCCAGCUAAGACCCUCA...<br>3' CUUAAAGUGGUUCCCGUUGGAGA             | 7mer-A1   | -0.08           | 57                         | -0.08                    | 0.113                   | N/A |

**Poorly conserved**

|                                  | Predicted consequential pairing of target region (top) and miRNA (bottom) | Site type | Context++ score | Context++ score percentile | Weighted context++ score | Conserved branch length | PCT |
|----------------------------------|---------------------------------------------------------------------------|-----------|-----------------|----------------------------|--------------------------|-------------------------|-----|
| Position 1235-1241 of ARC 3' UTR | 5' ...UGAUGUCCAGCUAAGACCCUCA...<br>3' CUUAAAGUGGUUCCCGUUGGAGA             | 7mer-A1   | -0.07           | 54                         | -0.07                    | 0.113                   | N/A |
| Position 1235-1241 of ARC 3' UTR | 5' ...UGAUGUCCAGCUAAGACCCUCA...<br>3' AGUGUGUGUCAUGUGUGGAGU               | 7mer-A1   | -0.04           | 44                         | -0.04                    | 0.113                   | N/A |

**Poorly conserved**

|                                 | Predicted consequential pairing of target region (top) and miRNA (bottom) | Site type | Context++ score | Context++ score percentile | Weighted context++ score | Conserved branch length | PCT |
|---------------------------------|---------------------------------------------------------------------------|-----------|-----------------|----------------------------|--------------------------|-------------------------|-----|
| Position 137-143 of DLG4 3' UTR | 5' ...UCUAACTUGAUGGAGCCACUG...<br>3' UCUAUGUUGUGUGGUGGAGCC                | 7mer-m8   | -0.11           | 71                         | -0.11                    | 0                       | N/A |
| Position 295-301 of DLG4 3' UTR | 5' ...CCAGCAGACAAAGAACCCACUG...<br>3' UCUAUGUUGUGUGGUGGAGCC               | 7mer-m8   | -0.12           | 73                         | -0.12                    | 0.091                   | N/A |
