# Supplementary material for: Dexmedetomidine reduces propofol-induced hippocampal neuron injury by modulating the miR-377-5p/Arc pathway
Source: PubMed Central journal article supplement (PMC8957152; doi:10.1186/s40360-022-00555-9), 2022-03-25

**Figure S3. Full-length blots/gels for protein expression determination of DNMT3A, DNMT3B, and Arc following exposure to the study drug in HT22 cells.**

|                 |          |          |          |          |
|-----------------|----------|----------|----------|----------|
| <b>propofol</b> | <b>-</b> | <b>+</b> | <b>+</b> | <b>-</b> |
| <b>DEX</b>      | <b>-</b> | <b>-</b> | <b>+</b> | <b>+</b> |

**DNMT3A**

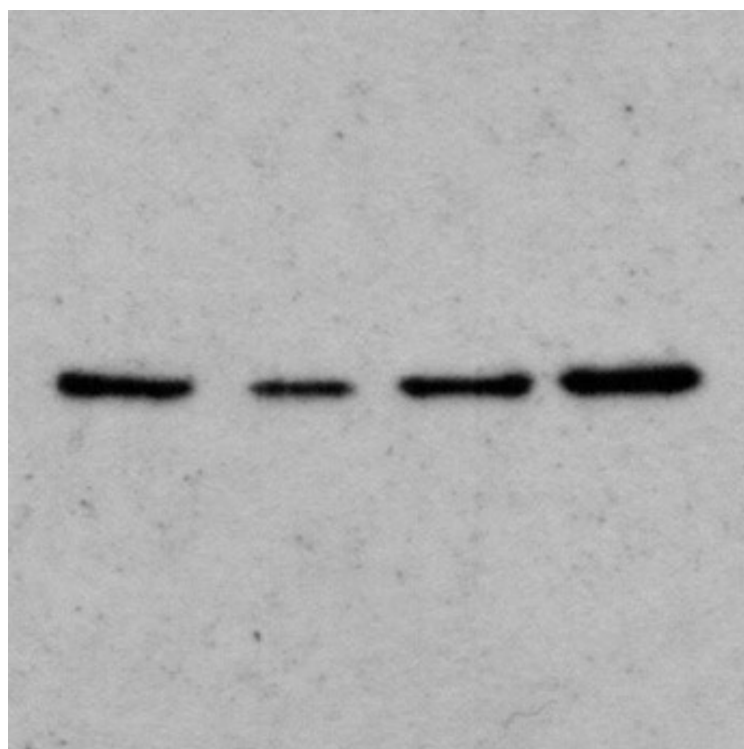

**DNMT3B**

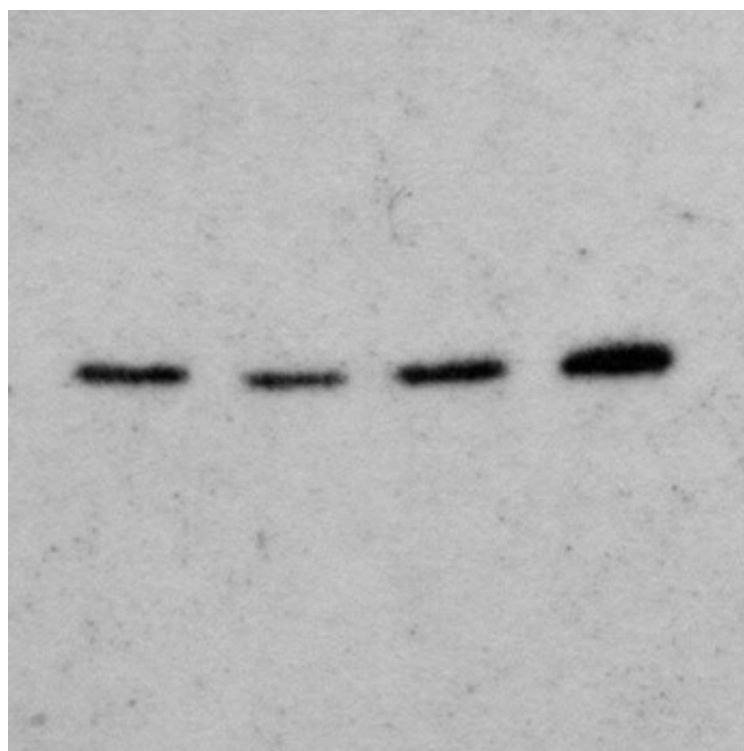

**Arc**

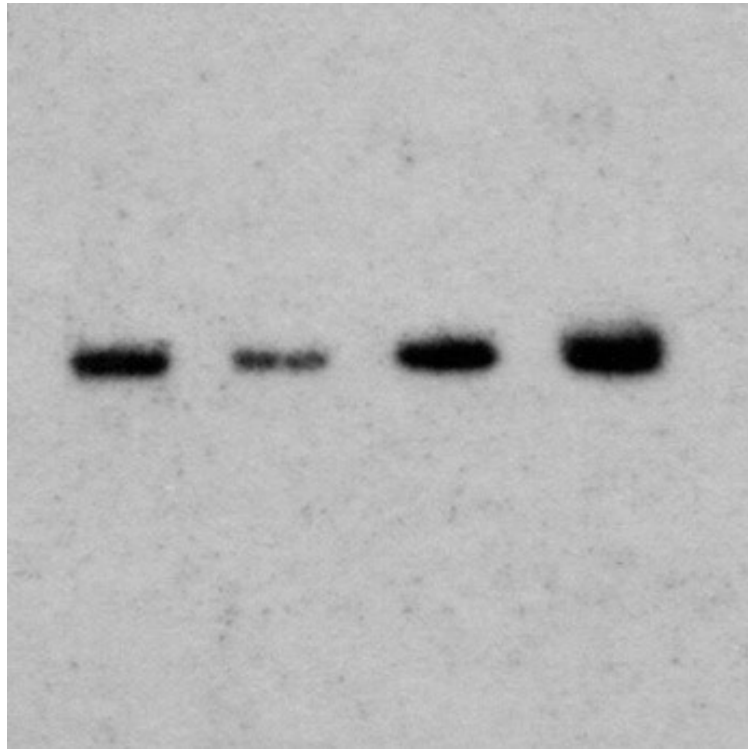

**$\beta$ -actin**

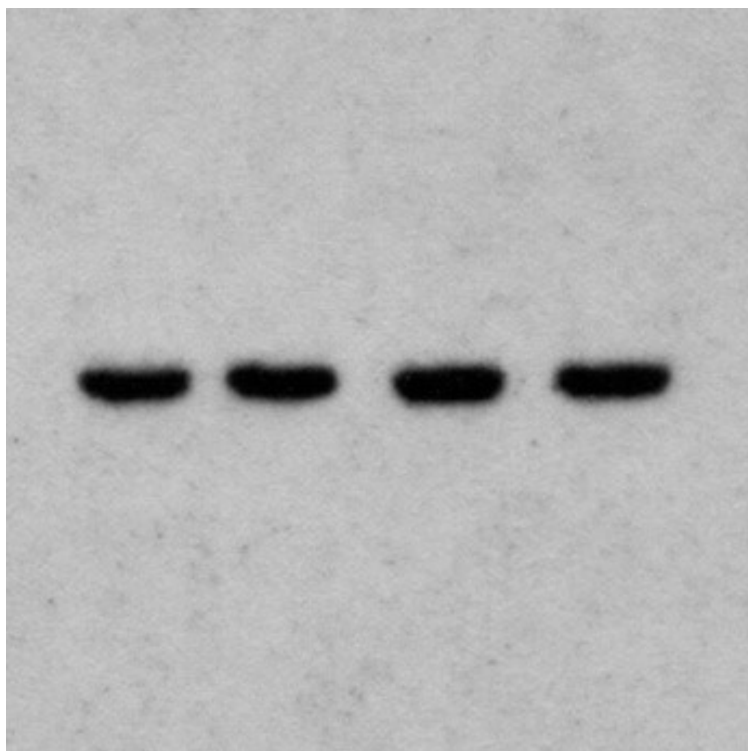

Supplement: 40360_2022_555_MOESM3_ESM.pdf [file 40360_2022_555_MOESM3_ESM.pdf]
