# Supplementary material for: Dexmedetomidine reduces propofol-induced hippocampal neuron injury by modulating the miR-377-5p/Arc pathway
Source: PubMed Central journal article supplement (PMC8957152; doi:10.1186/s40360-022-00555-9), 2022-03-25

**Figure S4. Full-length blots/gels for protein expression analysis of Arc after DNMT3A knockdown and overexpression in HT22 cells.**

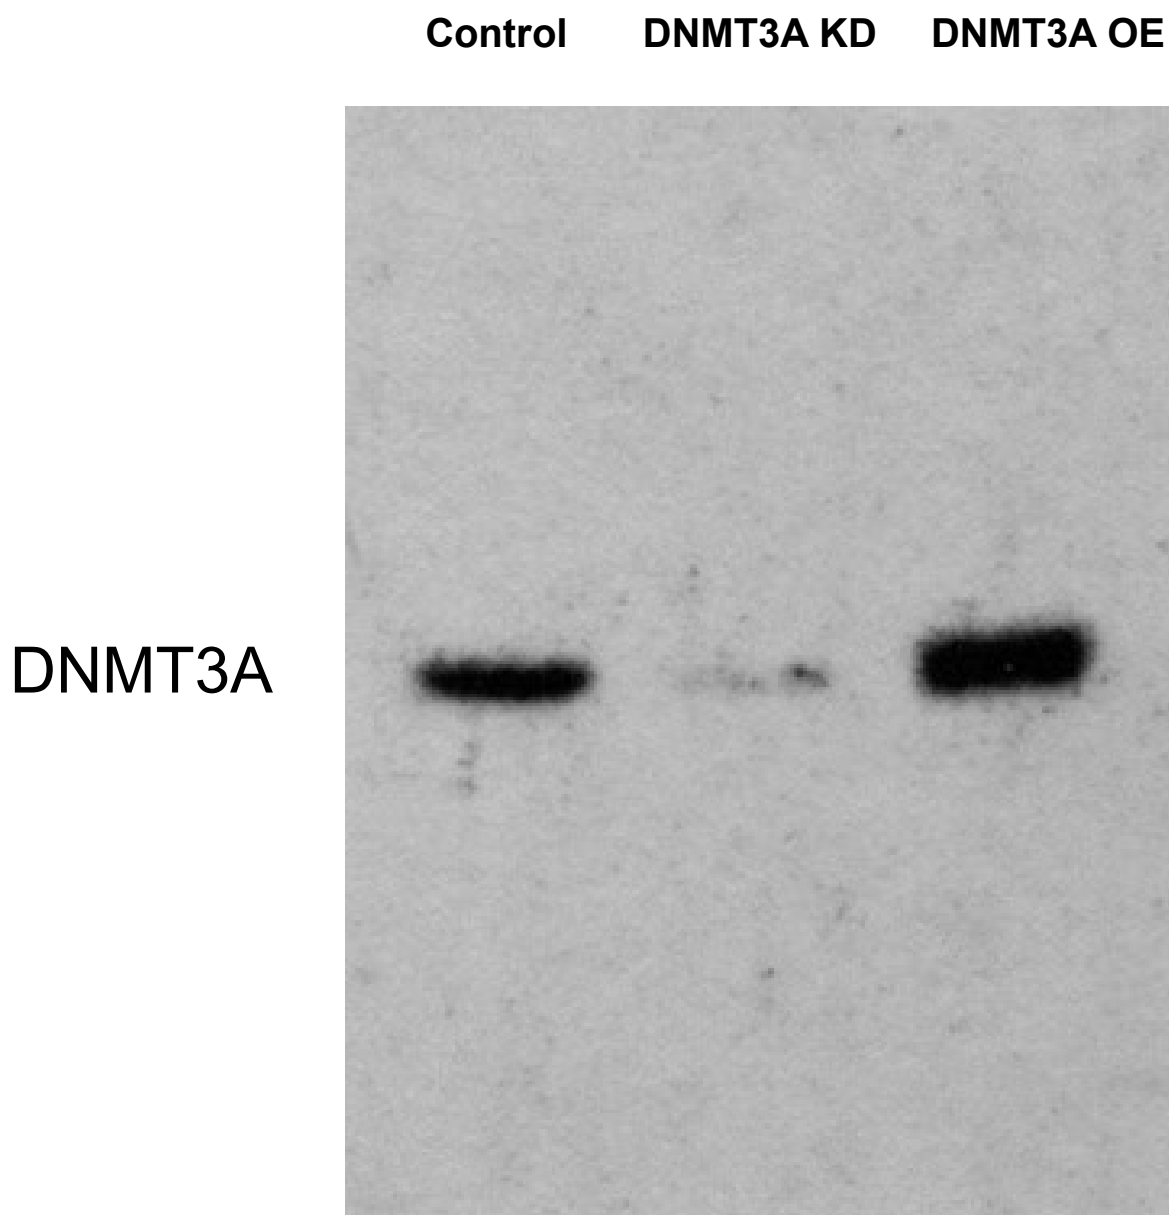

Control DNMT3A KD DNMT3A OE

Arc

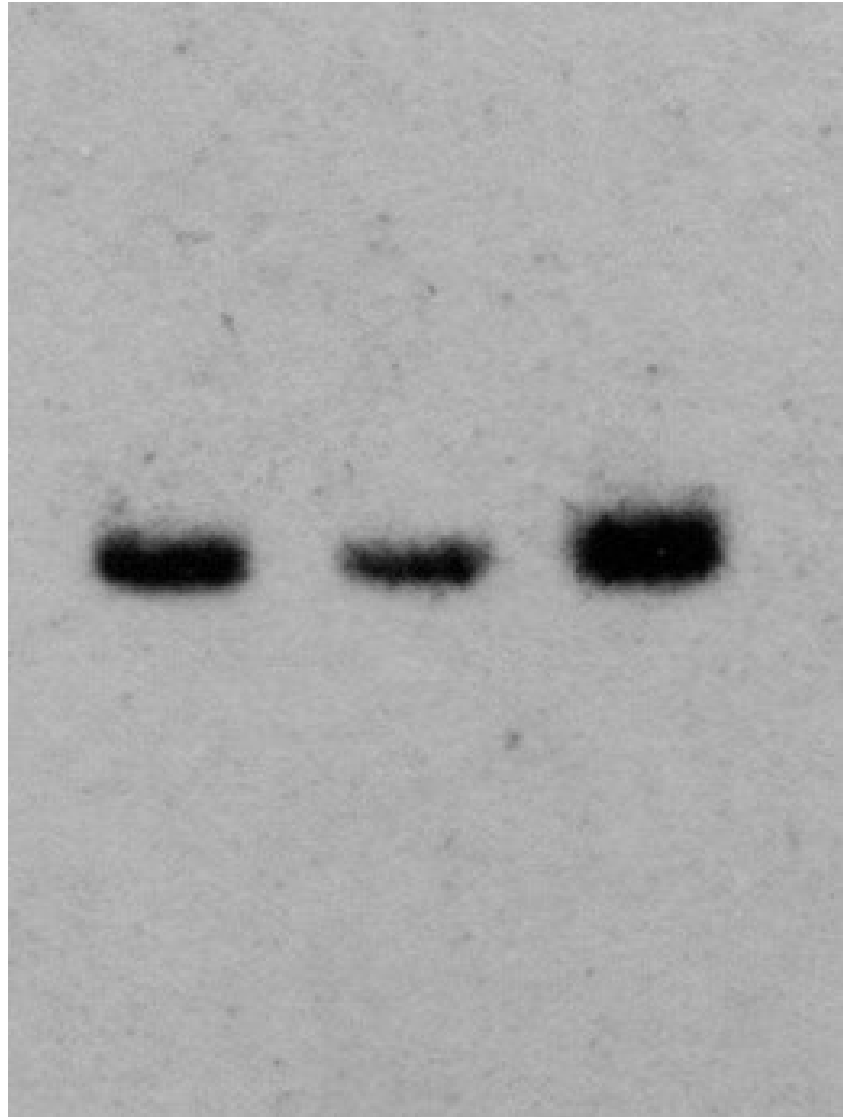

Control DNMT3A KD DNMT3A OE

$\beta$ -actin

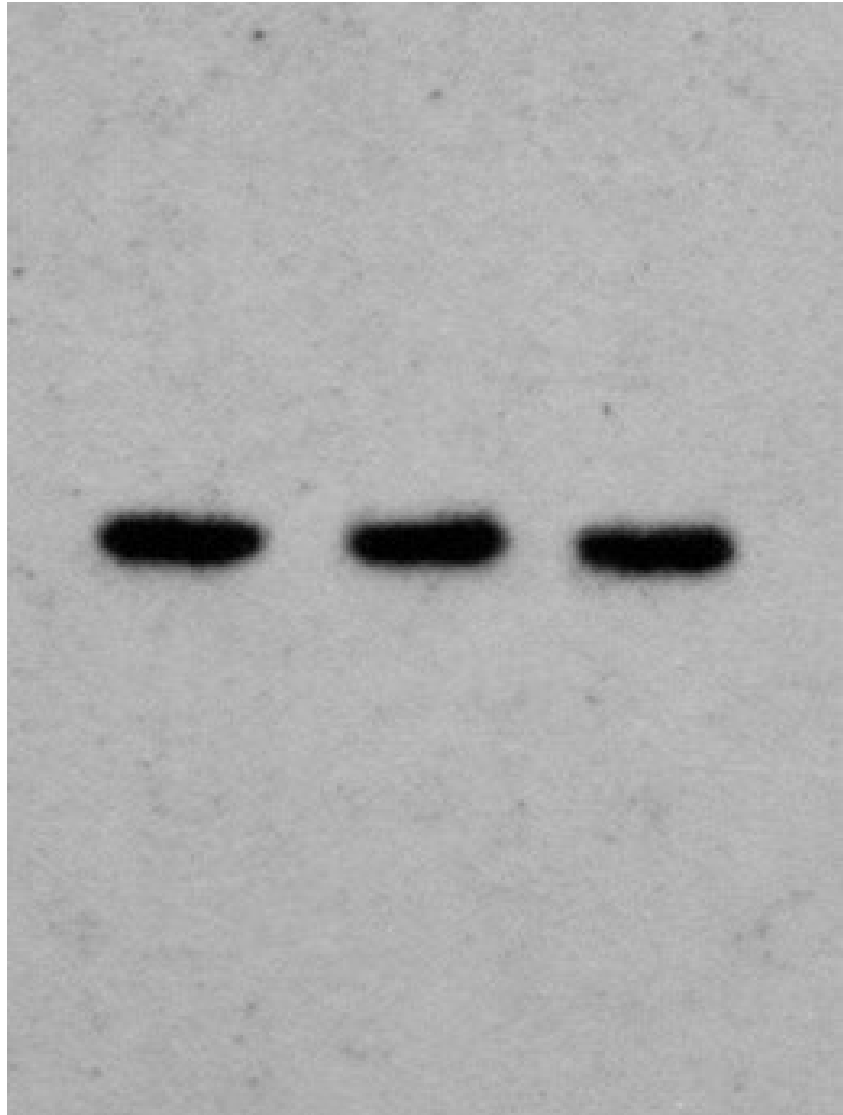

Supplement: 40360_2022_555_MOESM4_ESM.pdf [file 40360_2022_555_MOESM4_ESM.pdf]
