# Supplementary material for: Dexmedetomidine reduces propofol-induced hippocampal neuron injury by modulating the miR-377-5p/Arc pathway
Source: PubMed Central journal article supplement (PMC8957152; doi:10.1186/s40360-022-00555-9), 2022-03-25

Figure S6. Full-length blots/gels for protein expression tests of DNMT3A, Arc, caspase-3-35, and caspase-3-17 after drug treatment and/or Arc knockdown in HT22 cells .

control

propofol

propofol+DEX

propofol+DEX+ Arc KD

DNMT3A

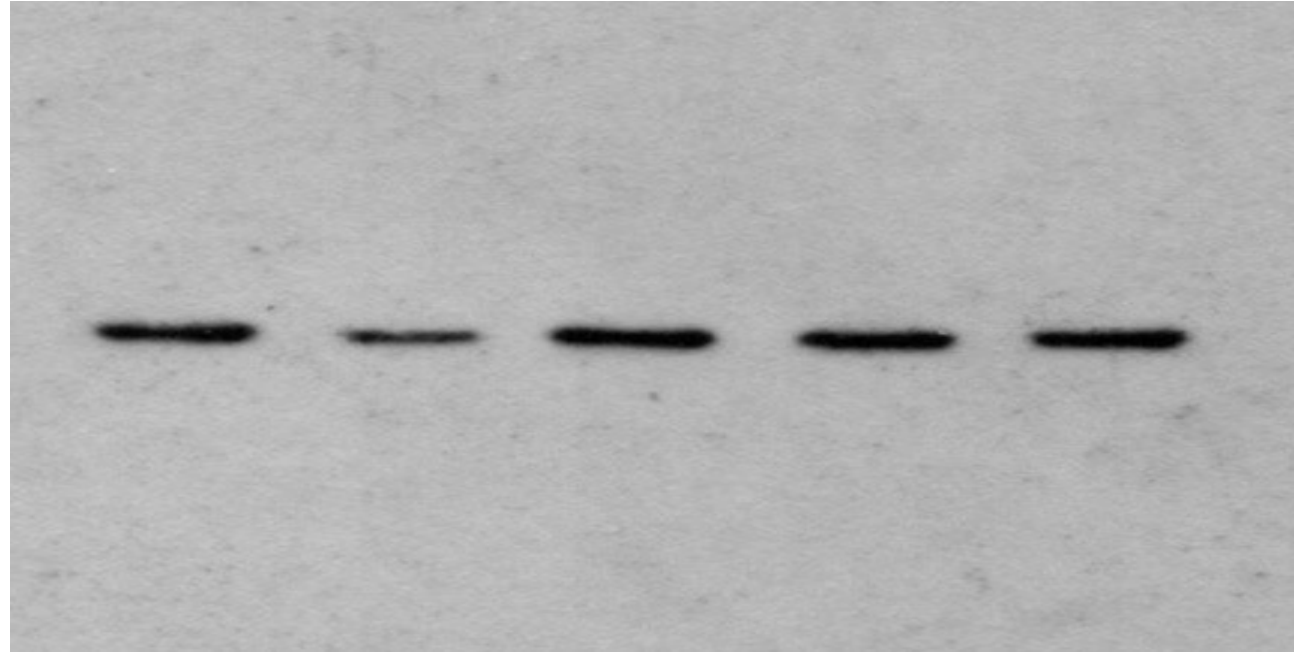

control

propofol

propofol+DEX

propofol+DEX+ Arc KD

Arc KD

Arc

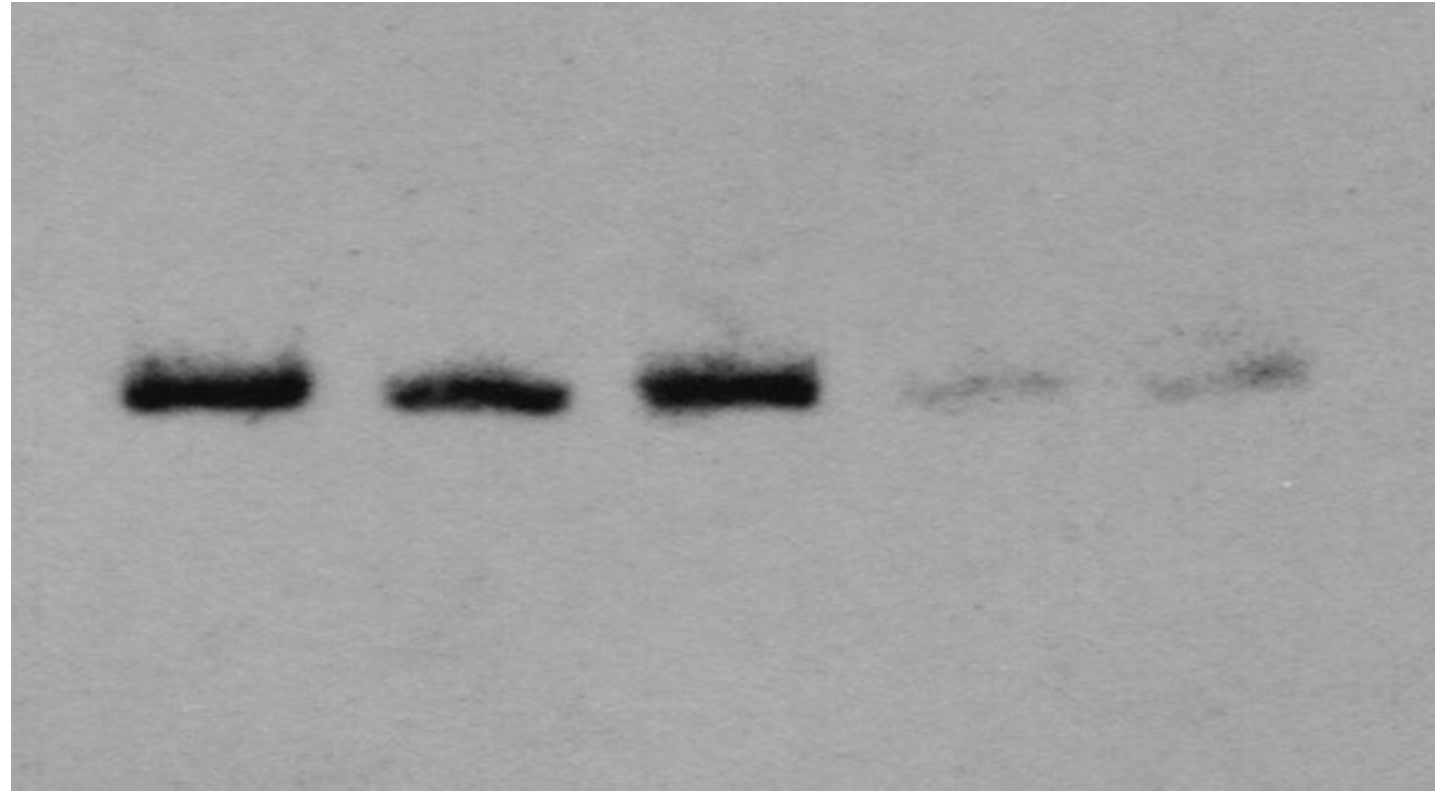

control      propofol      propofol+DEX      propofol+DEX+ Arc KD

Procaspase-3 (35 kDa)

Cleaved caspase-3 (17 kDa)

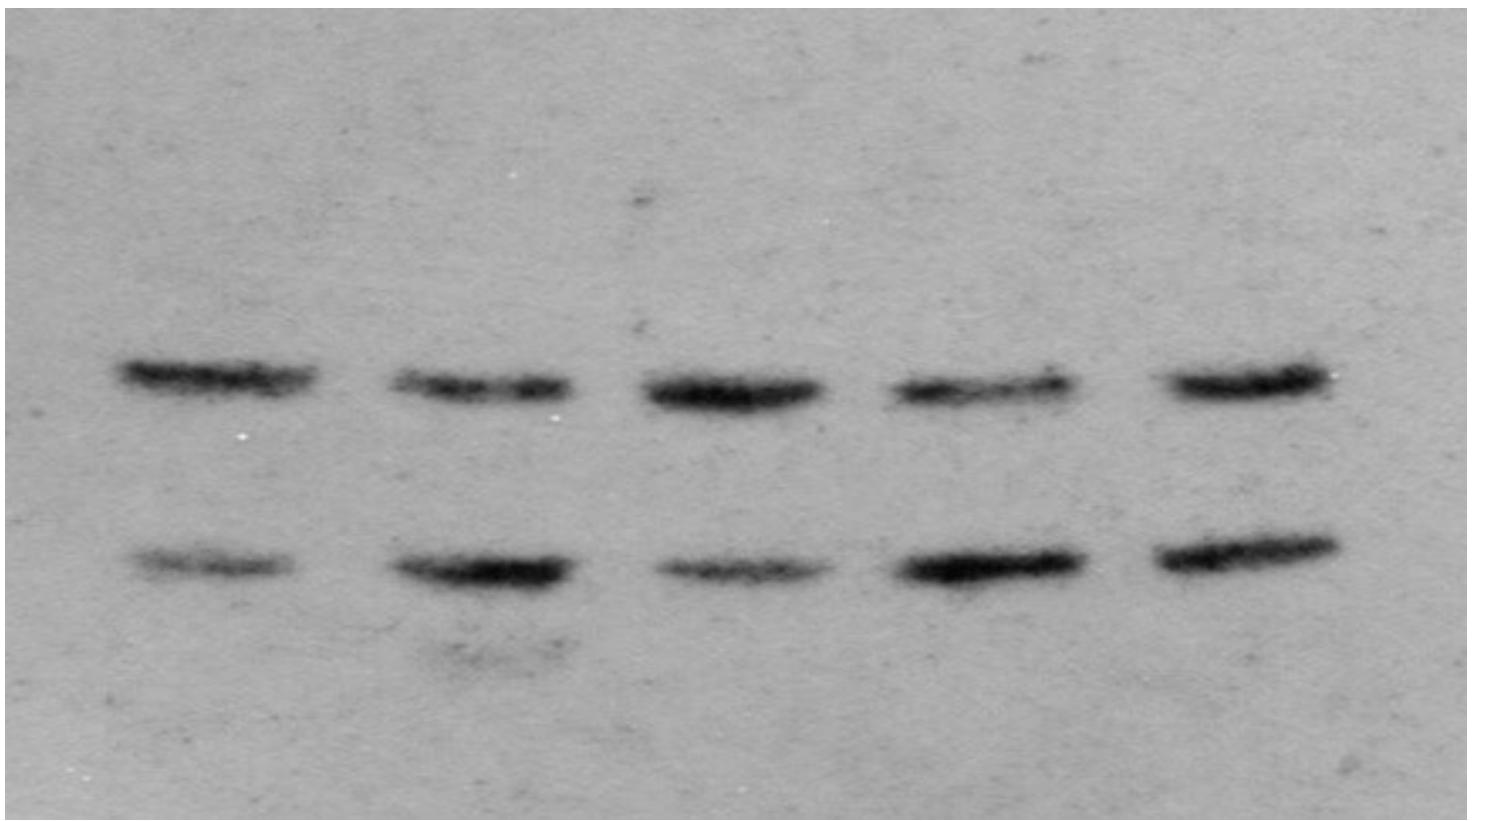

control

propofol

propofol+DEX

propofol+DEX+ Arc KD

$\beta$ -actin

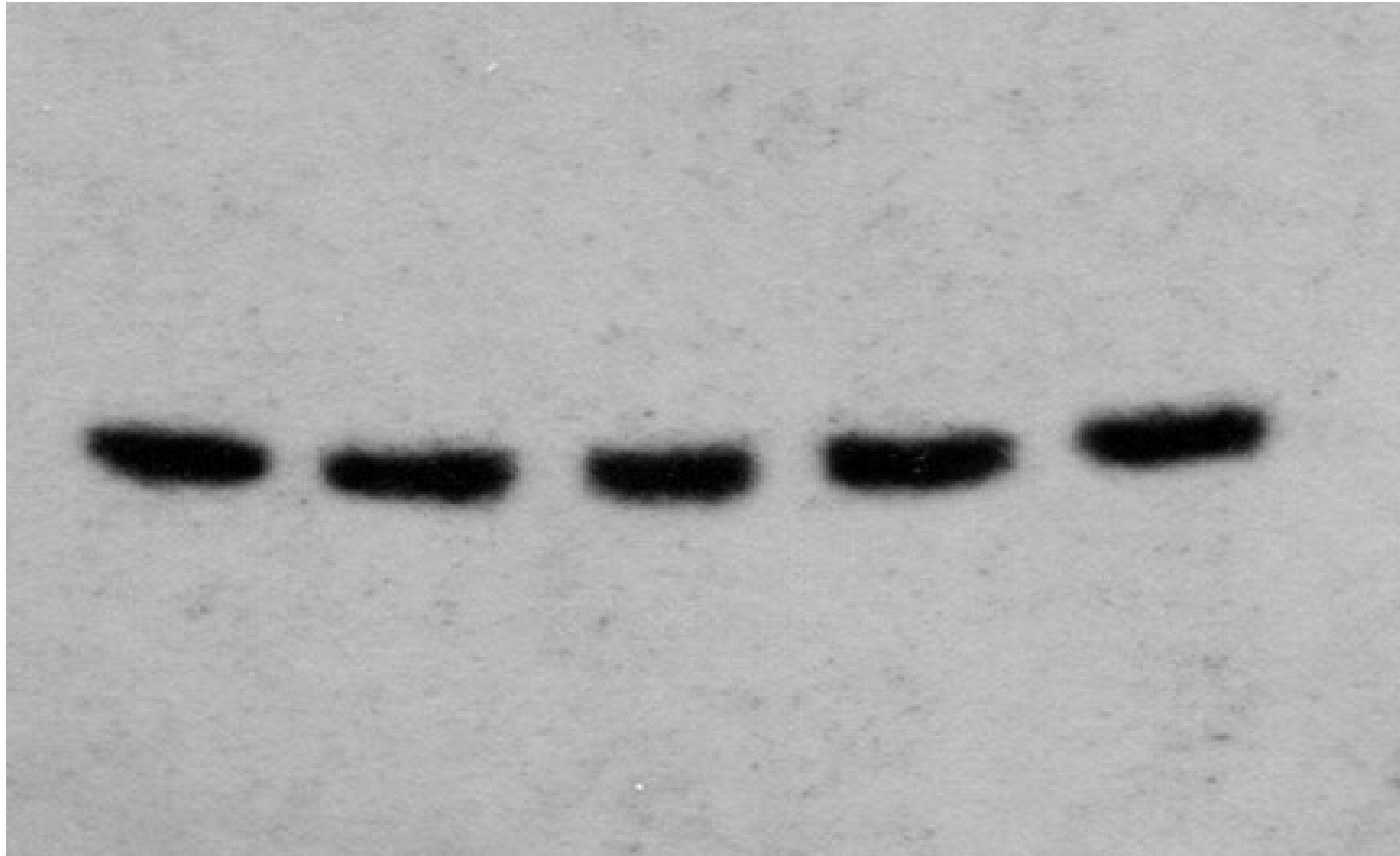

Supplement: 40360_2022_555_MOESM6_ESM.pdf [file 40360_2022_555_MOESM6_ESM.pdf]
