# Supplementary material for: Dexmedetomidine reduces propofol-induced hippocampal neuron injury by modulating the miR-377-5p/Arc pathway
Source: PubMed Central journal article supplement (PMC8957152; doi:10.1186/s40360-022-00555-9), 2022-03-25

**Figure S7. Full-length membranes with membrane edges visible for all protein expression tests.**

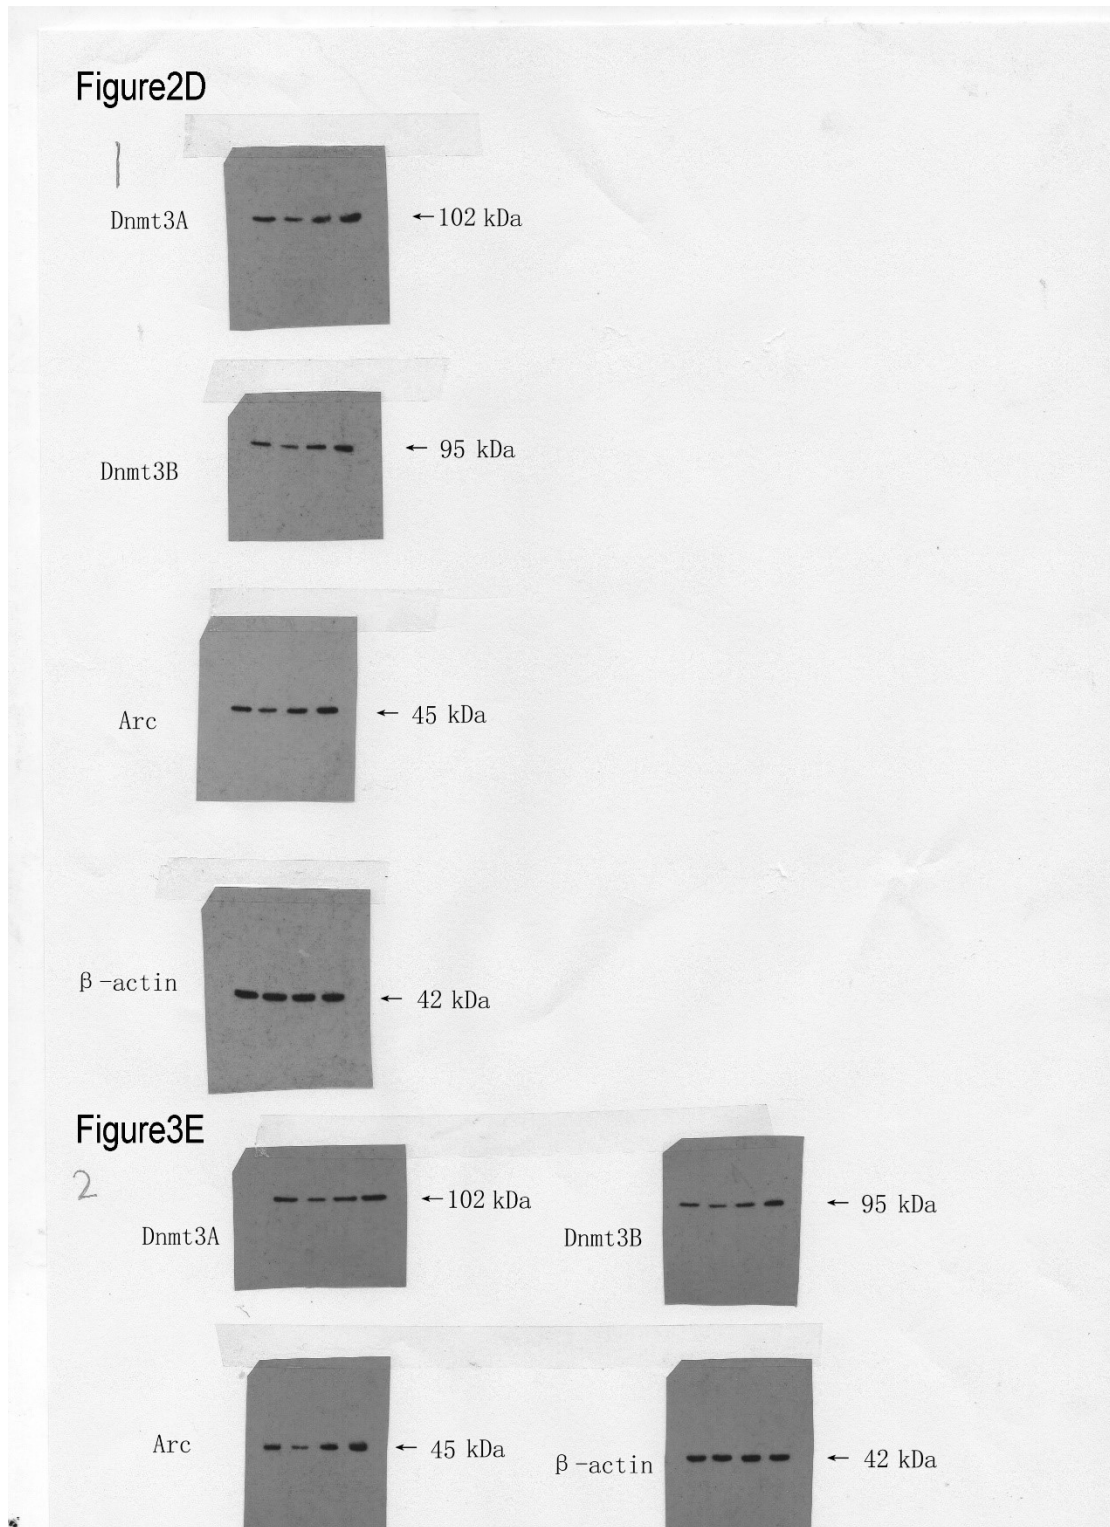

3  
**Figure4B**

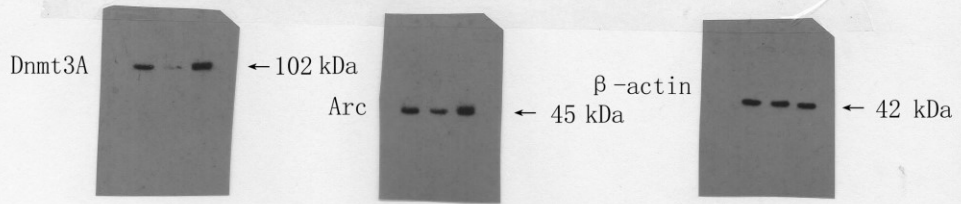

4  
**Figure4H**

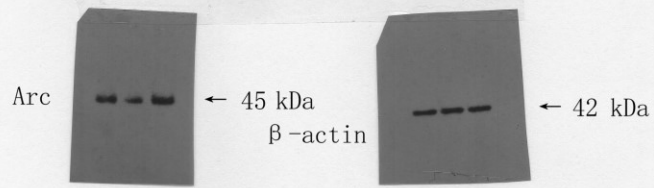

5  
**Figure6A**

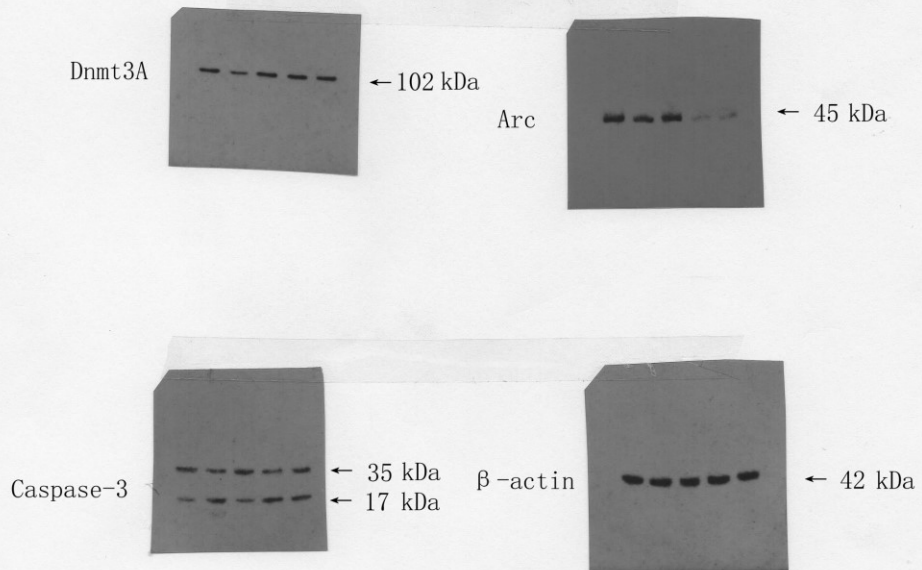

Supplement: 40360_2022_555_MOESM7_ESM.pdf [file 40360_2022_555_MOESM7_ESM.pdf]
